# Supplementary material for: FINDSITELHM: A Threading-Based Approach to Ligand Homology Modeling
Source: PLOS journal article supplement (doi:10.1371/journal.pcbi.1000405), 2009-06-04
Supplement: S3 (10.1371/journal.pcbi.1000405.s003) [file journal.pcbi.1000405.s003]

**Table S3.** Multiple common anchor substructures (blue) identified from weakly homologous threading templates for D-xylose isomerase from *Arthrobacter sp.* (PDB-ID: 1die) compared to the conserved substrate substructure reported by Chiang *et al.* (red). The overlap between both substructures is colored in green. The anchor substructures are presented for selected ligand clusters obtained for top-ranked binding pockets.

|                                                           | Ligands                                                                                                | PDB-ID | SID <sup>*</sup> | TM-score/RMSD <sup>†</sup> | SCOP superfamily/family                                | EC <sup>‡</sup> |
|-----------------------------------------------------------|--------------------------------------------------------------------------------------------------------|--------|------------------|----------------------------|--------------------------------------------------------|-----------------|
| Target protein                                            | 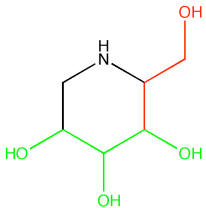<br>1-Deoxynojirmycin | 1die   | -                | -                          | Xylose isomerase-like/<br>Xylose isomerase             | 5.3.1.5         |
| Cluster: 1<br>Templates: 12<br>RMSD <sup>§</sup> : 3.49 Å | <br>Calystegine B2   | 2cbv   | 19.5%            | 0.53/4.65 Å                | (Trans)glycosidases/<br>Family 1 of glycosyl hydrolase | 3.2.1.21        |

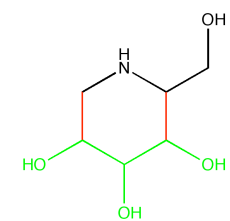

1-Deoxynojirimycin

1oim

19.5%

0.53/4.64 Å

(Trans)glycosidases/  
Family 1 of glycosyl hydrolase

3.2.1.21

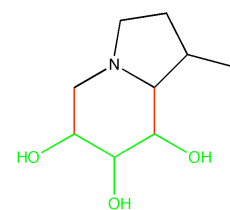

Castanospermine

2cbu

19.7%

0.54/4.67 Å

(Trans)glycosidases/  
Family 1 of glycosyl hydrolase

3.2.1.21

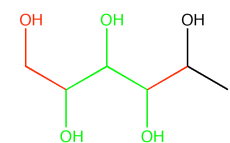

L-rhamnitol

1de5

19.3%

0.68/3.45 Å

Xylose isomerase-like/  
L-rhamnose isomerase

5.3.1.14

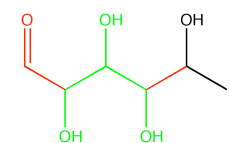

L-rhamnose

1de6

19.3%

0.68/3.50 Å

Xylose isomerase-like/  
L-rhamnose isomerase

5.3.1.14

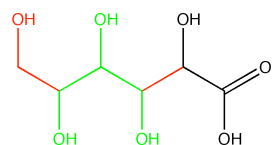

Gluconic acid

1bgg

18.8%

0.53/4.66 Å

(Trans)glycosidases/  
Family 1 of glycosyl hydrolase

3.2.1.21

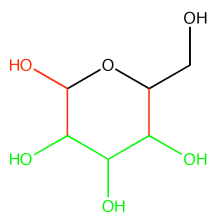

α-D-glucose

1hiz

16.4%

0.55/5.05 Å

(Trans)glycosidases/  
Beta-glycanases

3.2.1.8

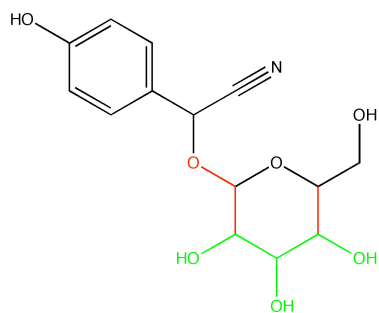

Dhurrin

1e55

20.1%

0.49/4.69 Å

(Trans)glycosidases/  
Family 1 of glycosyl hydrolase

3.2.1.21

---

Cluster: 2

Templates: 12

RMSD<sup>S</sup>: 5.61 Å

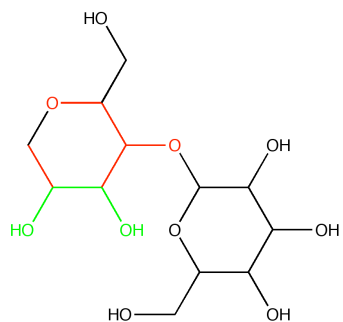

$\beta$ -D-mannose- $\alpha$ -D-mannose

2man

15.3%

0.63/4.38 Å

(Trans)glycosidases/  
Beta-glycanases

3.2.1.78

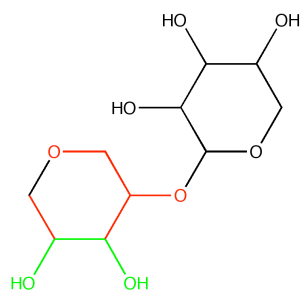

Xylobiose

1vbr

17.9%

0.62/4.89 Å

(Trans)glycosidases/  
Beta-glycanases

3.2.1.8

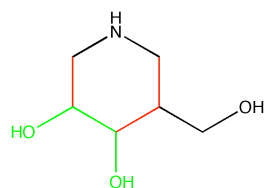

5-Hydroxymethyl-3,4-  
dihydropiperidine

1oif

19.8%

0.53/4.61 Å

(Trans)glycosidases/  
Family 1 of glycosyl hydrolase

3.2.1.21

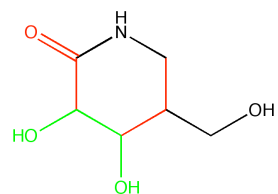

(3S,4R,5R)-3,4-dihydroxy-5-(hydroxymethyl)piperidin-2-one

1uz4

19.2%

0.54/4.75 Å

(Trans)glycosidases/  
Beta-glycanases

-

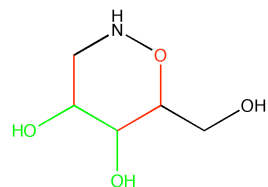

Tetrahydrooxazine

1w3j

19.3%

0.53/4.62 Å

(Trans)glycosidases/  
Beta-glycanases

3.2.1.21

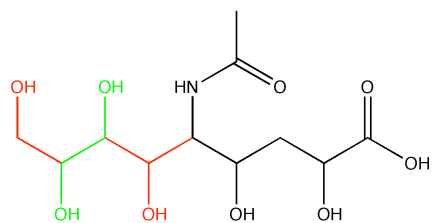

2,4,6,7,8,9-Hexahydroxy-5-methylcarboxamido nonanoic acid

1f73

17.5%

0.59/3.92 Å

Aldolase/Class I aldolase

4.1.3.3

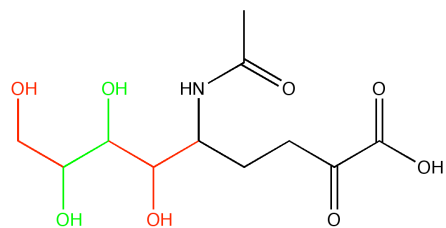

6,7,8,9-Tetrahydroxy-5-methylcarboxamido-2-oxononanoic acid

1f74

17.5%

0.58/4.11 Å

Aldolase/Class I aldolase

4.1.3.3

Cluster: 3

Templates: 12

RMSD<sup>S</sup>: 3.86 Å

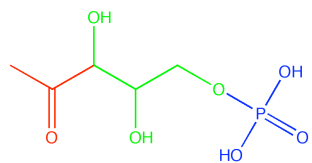

1-Deoxy-D-xylulose-5-phosphate

1ixn

19.6%

0.69/3.76 Å

Pyridoxine 5'-phosphate  
synthase/  
Pyridoxine 5'-phosphate  
synthase

-

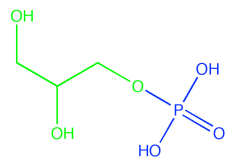

Glycerol-3-phosphate

1ixo

19.3%

0.71/3.78 Å

Pyridoxine 5'-phosphate  
synthase/  
Pyridoxine 5'-phosphate  
synthase

-

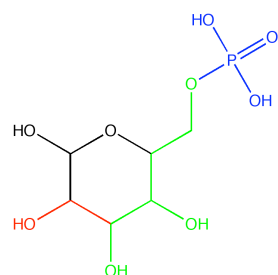

$\beta$ -Galactose-6-phosphate

4pbg

21.2%

0.51/4.49 Å

(Trans)glycosidases/  
Family 1 of glycosyl hydrolase

3.2.1.85

Cluster: 4

Templates: 2

RMSD<sup>§</sup>: 0.71 Å

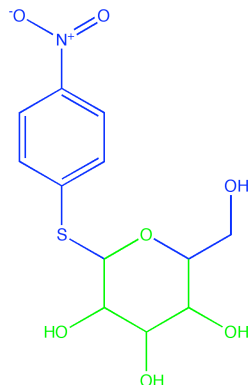

Para-nitrophenyl-1-thio- $\beta$ -D-glucopyranoside

1e1f

19.5%

0.49/4.67 Å

(Trans)glycosidases/  
Family 1 of glycosyl hydrolase

3.2.1.21

\*Sequence identity. <sup>†</sup>TM-score and C $\alpha$  RMSD of the aligned region reported by TM-align. <sup>‡</sup>Enzyme Commission nomenclature. <sup>§</sup>Average pairwise RMSD of the anchor heavy atoms calculated for all ligands that belong to a particular cluster.
